# Supplementary material for: Identification of young adults at risk of an accelerated loss of kidney function in an area affected by Mesoamerican nephropathy
Source: Springer Nature journal article supplement (doi:10.1186/s12882-018-1193-x), 2019-01-16

## ***Identification of young adults at risk of accelerated kidney function loss in an area affected by Mesoamerican nephropathy***

Marvin Gonzalez-Quiroz<sup>1,2,3</sup>, Evangelia-Theano Smpokou<sup>3</sup>, Neil Pearce<sup>2</sup>, Ben Caplin<sup>3\*</sup>, Dorothea Nitsch<sup>2\*</sup>

<sup>1</sup>Research Centre on Health, Work and Environment (CISTA), National Autonomous University of Nicaragua at León (UNAN-León), León, Nicaragua. <sup>2</sup>Department of Non-Communicable Disease Epidemiology, London School of Hygiene and Tropical Medicine, London, UK. <sup>3</sup>Centre for Nephrology, University College London, London, UK.

### ***Supplementary Material***

#### ***Figures:***

Figure S1: Bland-Altman for eGFR based on serum creatinine levels measured in Nicaragua and serum creatinine levels measured in London.

Figure S2: ROC curves for the model predicting stable kidney function versus established renal dysfunction. The 95% confidence intervals for the ROC curves (0.5) are displayed.

Figure S3: ROC curves for the model predicting stable kidney function versus a rapid decline in kidney function. The 95% confidence intervals for ROC curves (0.5) are displayed.

#### ***Tables:***

Table S1: Multivariate adjusted logistic regression analysis for eGFR and uNGAL associated with established renal dysfunction at baseline among apparently healthy young males

Table S2: Multivariate adjusted logistic regression analysis for eGFR and uNGAL associated with a rapid decline in kidney function at baseline among apparently healthy young males

Table S3: Multivariate adjusted logistic regression analysis of factors associated with established renal dysfunction at baseline among apparently healthy young males

Table S4: Multivariate adjusted logistic regression analysis for factors associated with a rapid decline in kidney function at baseline among apparently healthy young males

**Figure S1:** Bland-Altman for eGFR based on serum creatinine levels measured in Nicaragua and serum creatinine levels measured in London.

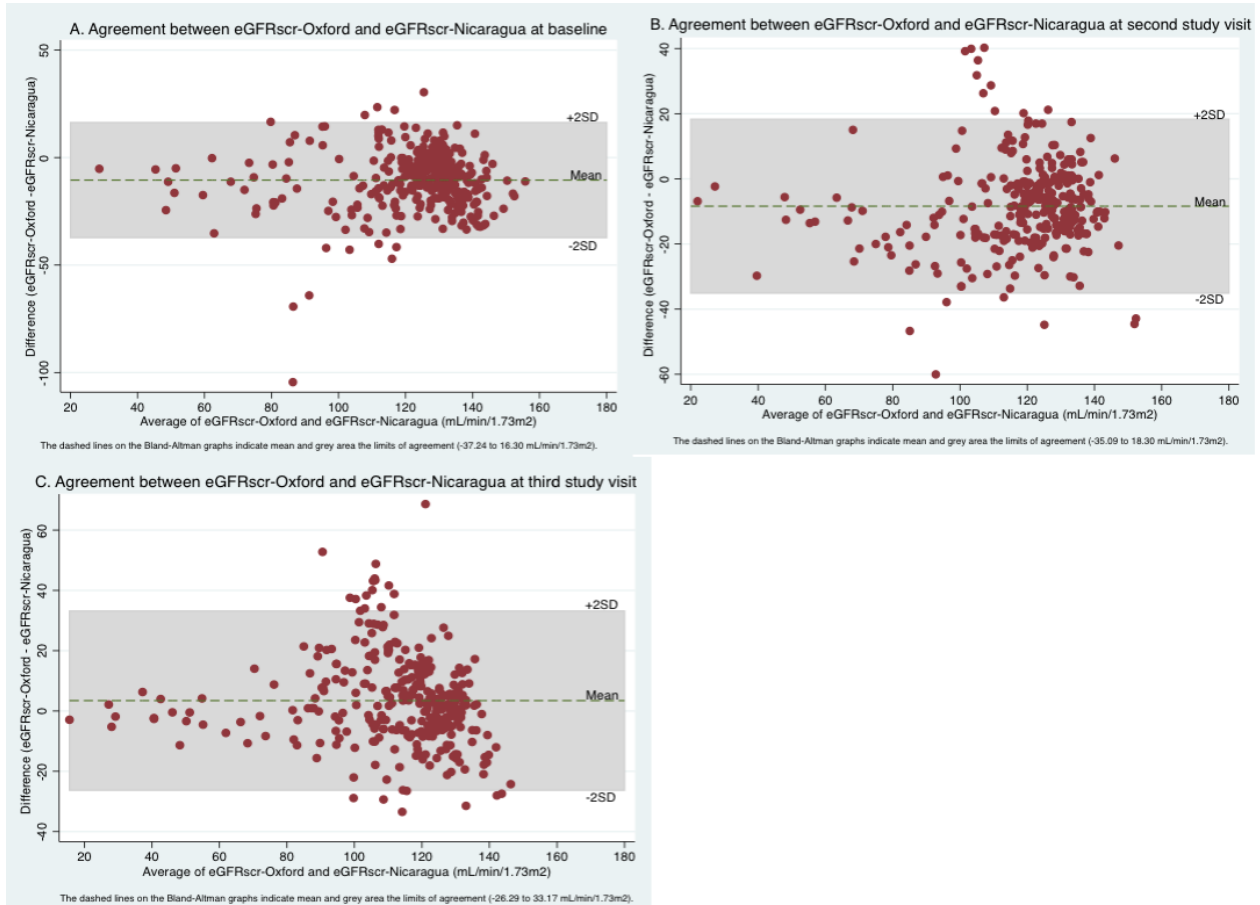

**Table S1: Multivariate adjusted logistic regression analysis for eGFR and uNGAL associated with established renal dysfunction at baseline among apparently healthy young males**

| Factors                         | Model 1 (n=80)       |      |                |         | Model 2 (n=80)    |      |                |         |
|---------------------------------|----------------------|------|----------------|---------|-------------------|------|----------------|---------|
|                                 | Without uNGAL levels |      |                |         | With uNGAL levels |      |                |         |
|                                 | Coefficient          | SE   | 95% CI         | P-value | Coefficient       | SE   | 95% CI         | P-value |
| eGFR <sub>scr</sub> at baseline | -0.14                | 0.03 | -0.22 to -0.07 | <0.001  | -0.15             | 0.04 | -0.24 to -0.06 | <0.001  |
| Urinary NGAL                    | --                   | --   | --             | --      | 3.16              | 1.44 | 0.34 to 5.99   | 0.028   |

*Abbreviations: SE: standard error, uNGAL: urinary neutrophil gelatinase-associated lipocalin, eGFR<sub>scr</sub>: estimated glomerular filtration rate based on locally measured creatinine levels.*

**Table S2: Multivariate adjusted logistic regression analysis for eGFR and uNGAL associated with a rapid decline in kidney function at baseline among apparently healthy young males**

| Factors                                   | Figure 2A                           |      |               |         |                                  |      |               |         | Figure 2B                           |      |                |         |
|-------------------------------------------|-------------------------------------|------|---------------|---------|----------------------------------|------|---------------|---------|-------------------------------------|------|----------------|---------|
|                                           | Model 3 without uNGAL levels (n=79) |      |               |         | Model 4 with uNGAL levels (n=79) |      |               |         | Model 5 without uNGAL levels (n=68) |      |                |         |
|                                           | Coefficient                         | SE   | 95% CI        | P-value | Coefficient                      | SE   | 95% CI        | P-value | Coefficient                         | SE   | 95% CI         | P-value |
| eGFR <sub>Scr</sub> at baseline           | 0.003                               | 0.01 | -0.02 to 0.03 | 0.808   | 0.004                            | 0.01 | -0.02 to 0.03 | 0.798   | -0.01                               | 0.01 | -0.04 to 0.02  | 0.507   |
| Urinary NGAL                              | -                                   | -    | -             | -       | 0.81                             | 0.45 | -0.06 to 1.70 | 0.070   | -                                   | -    | -              | -       |
| eGFR <sub>Scr</sub> at second study visit | -                                   | -    | -             | -       | -                                | -    | -             | -       | -0.06                               | 0.02 | -0.10 to -0.01 | 0.015   |
| eGFR <sub>Scr</sub> at third study visit  | -                                   | -    | -             | -       | -                                | -    | -             | -       | -                                   | -    | -              | -       |

Abbreviations: SE: standard error, uNGAL: urinary neutrophil gelatinase-associated lipocalin, eGFR<sub>Scr</sub>: estimated glomerular filtration rate based on locally measured creatinine levels.

**Continued: Table S2: Multivariate adjusted logistic regression analysis for eGFR and uNGAL associated with a rapid decline in kidney function at baseline among apparently healthy young males**

| Factors                                   | Figure 2B                        |      |                 |         | Figure 2C                           |      |                |         |                                  |      |                |         |
|-------------------------------------------|----------------------------------|------|-----------------|---------|-------------------------------------|------|----------------|---------|----------------------------------|------|----------------|---------|
|                                           | Model 6 with uNGAL levels (n=68) |      |                 |         | Model 7 without uNGAL levels (n=73) |      |                |         | Model 8 with uNGAL levels (n=73) |      |                |         |
|                                           | Coefficient                      | SE   | 95% CI          | P-value | Coefficient                         | SE   | 95% CI         | P-value | Coefficient                      | SE   | 95% CI         | P-value |
| eGFR <sub>Scr</sub> at baseline           | -0.01                            | 0.01 | -0.04 to 0.02   | 0.501   | 0.01                                | 0.01 | -0.01 to 0.05  | 0.328   | 0.01                             | 0.01 | -0.01 to 0.05  | 0.330   |
| Urinary NGAL                              | 0.54                             | 0.95 | -0.57 to 1.65   | 0.310   | -                                   | -    | -              | -       | 0.56                             | 0.56 | -0.54 to 1.67  | 0.319   |
| eGFR <sub>Scr</sub> at second study visit | -0.05                            | 0.02 | -0.10 to -0.006 | 0.025   | -                                   | -    | -              | -       | -                                | -    | -              | -       |
| eGFR <sub>Scr</sub> at third study visit  | -                                | -    | -               | -       | -0.06                               | 0.01 | -0.09 to -0.02 | <0.001  | -0.05                            | 0.01 | -0.09 to -0.02 | 0.001   |

Abbreviations: SE: standard error, uNGAL: urinary neutrophil gelatinase-associated lipocalin, eGFR<sub>Scr</sub>: estimated glomerular filtration rate based on locally measured creatinine levels.

**Continued: Table S2: Multivariate adjusted logistic regression analysis for eGFR and uNGAL associated with a rapid decline in kidney function at baseline among apparently healthy young males**

| Factors                                   | Figure 2D                           |      |                |         |                                   |      |                |         |
|-------------------------------------------|-------------------------------------|------|----------------|---------|-----------------------------------|------|----------------|---------|
|                                           | Model 9 without uNGAL levels (n=67) |      |                |         | Model 10 with uNGAL levels (n=67) |      |                |         |
|                                           | Coefficient                         | SE   | 95% CI         | P-value | Coefficient                       | SE   | 95% CI         | P-value |
| eGFR <sub>Scr</sub> at baseline           | -0.004                              | 0.01 | -0.04 to 0.03  | 0.812   | -0.004                            | 0.01 | -0.04 to 0.03  | 0.798   |
| eGFR <sub>Scr</sub> at second study visit | -0.02                               | 0.02 | -0.07 to 0.02  | 0.404   | -0.01                             | 0.02 | -0.06 to 0.03  | 0.485   |
| eGFR <sub>Scr</sub> at third study visit  | -0.06                               | 0.02 | -0.10 to -0.02 | 0.002   | -0.06                             | 0.02 | -0.10 to -0.02 | 0.002   |
| Urinary NGAL                              | -                                   | -    | -              | -       | 0.44                              | 0.66 | -0.86 to 1.74  | 0.508   |

Abbreviations: SE: standard error, uNGAL: urinary neutrophil gelatinase-associated lipocalin, eGFR<sub>Scr</sub>: estimated glomerular filtration rate based on locally measured creatinine levels.

**Table S3: Multivariate adjusted logistic regression analysis of factors associated with established renal dysfunction at baseline among apparently healthy young males**

| Factors                         | Model 1 (n=74)       |      |                |         | Model 2 (n=74)    |      |                 |         |
|---------------------------------|----------------------|------|----------------|---------|-------------------|------|-----------------|---------|
|                                 | Without uNGAL levels |      |                |         | With uNGAL levels |      |                 |         |
|                                 | Coefficient          | SE   | 95% CI         | P-value | Coefficient       | SE   | 95% CI          | P-value |
| Age                             | 0.14                 | 0.22 | -0.29 to 0.57  | 0.525   | 0.12              | 0.22 | -0.30 to 0.56   | 0.563   |
| Season                          |                      |      |                |         |                   |      |                 |         |
| Summer                          | 0.0                  | --   | --             | --      | 0                 | --   | --              | --      |
| Winter                          | 1.00                 |      |                |         |                   |      |                 |         |
| Outdoor work                    |                      |      |                |         |                   |      |                 |         |
| Yes                             | 7.14                 | 4.14 | -0.97 to 15.26 | 0.084   | 7.57              | 5.42 | -3.05 to 18.20  | 0.162   |
| No                              | 1.00                 |      |                |         | 1.00              |      |                 |         |
| Urinary ACR                     |                      |      |                |         |                   |      |                 |         |
| ≥30 mg/g                        | 0                    | --   | --             | --      | 0                 | --   | --              | --      |
| <30 mg/g                        | 1.00                 |      |                |         | 1.00              |      |                 |         |
| Urinary NGAL                    | --                   | --   | --             | --      | 3.31              | 1.87 | 0.35 to 6.99    | 0.077   |
| eGFR <sub>Scr</sub> at baseline | -0.26                | 0.10 | -0.47 to -0.05 | 0.014   | -0.27             | 0.13 | -0.54 to -0.005 | 0.045   |

Abbreviations: SE: standard error, uNGAL: urinary neutrophil gelatinase-associated lipocalin, UACR: urinary albumin creatinine ratio, eGFR<sub>Scr</sub>: estimated glomerular filtration rate based on locally measured creatinine levels.

**Table S4: Multivariate adjusted logistic regression analysis of factors associated with a rapid decline in kidney function at baseline among apparently healthy young males**

| Factors                                   | Figure 2A                           |      |               |         |                                  |      |                 |         | Figure 2B                           |      |                |         |
|-------------------------------------------|-------------------------------------|------|---------------|---------|----------------------------------|------|-----------------|---------|-------------------------------------|------|----------------|---------|
|                                           | Model 3 without uNGAL levels (n=78) |      |               |         | Model 4 with uNGAL levels (n=78) |      |                 |         | Model 5 without uNGAL levels (n=67) |      |                |         |
|                                           | Coefficient                         | SE   | 95% CI        | P-value | Coefficient                      | SE   | 95% CI          | P-value | Coefficient                         | SE   | 95% CI         | P-value |
| Age                                       | -0.06                               | 0.06 | -0.19 to 0.06 | 0.354   | -0.06                            | 0.06 | -0.20 to 0.06   | 0.327   | -0.11                               | 0.09 | -0.29 to 0.05  | 0.187   |
| Season                                    |                                     |      |               |         |                                  |      |                 |         |                                     |      |                |         |
| Summer                                    | 0                                   | --   | --            | --      | 0                                | --   | --              | --      | 0                                   | --   | --             | --      |
| Winter                                    | 1.00                                |      |               |         | 1.00                             |      |                 |         | 1.00                                |      |                |         |
| Outdoor work                              |                                     |      |               |         |                                  |      |                 |         |                                     |      |                |         |
| Yes                                       | 1.59                                | 1.08 | -0.54 to 3.72 | 0.144   | 1.77                             | 1.10 | -0.39 to 3.94   | 0.110   | 1.42                                | 1.12 | -0.78 to 3.63  | 0.206   |
| No                                        | 1.00                                |      |               |         | 1.00                             |      |                 |         | 1.00                                |      |                |         |
| Urinary ACR                               |                                     |      |               |         |                                  |      |                 |         |                                     |      |                |         |
| ≥30 mg/g                                  | 0                                   | --   | --            | --      | 0                                | --   | --              | --      | 0                                   | --   | --             | --      |
| <30 mg/g                                  | 1.00                                |      |               |         | 1.00                             |      |                 |         | 1.00                                |      |                |         |
| Urinary NGAL                              | -                                   | -    | -             | -       | 0.97                             | 0.49 | -0.0008 to 1.94 | 0.050   | -                                   | -    | -              | -       |
| eGFR <sub>Scr</sub> at baseline           | -0.004                              | 0.01 | -0.03 to 0.02 | 0.789   | -0.004                           | 0.01 | -0.03 to 0.02   | 0.794   | -0.02                               | 0.02 | -0.06 to 0.01  | 0.237   |
| eGFR <sub>Scr</sub> at second study visit | -                                   | -    | -             | -       | -                                | -    | -               | -       | -0.06                               | 0.02 | -0.11 to -0.01 | 0.018   |
| eGFR <sub>Scr</sub> at third study visit  | -                                   | -    | -             | -       | -                                | -    | -               | -       | -                                   | -    | -              | -       |

Abbreviations: SE: standard error, UACR: urinary albumin creatinine ratio, uNGAL: urinary neutrophil gelatinase-associated lipocalin, eGFR<sub>Scr</sub>: estimated glomerular filtration rate based on locally measured creatinine levels.



**Continued: Table S4: Multivariate adjusted logistic regression analysis of factors associated with a rapid decline in kidney function at baseline among apparently healthy young males**

| Factors                                   | Figure 2B                        |      |                 |         | Figure 2C                           |      |                |         |                                  |      |                |         |
|-------------------------------------------|----------------------------------|------|-----------------|---------|-------------------------------------|------|----------------|---------|----------------------------------|------|----------------|---------|
|                                           | Model 6 with uNGAL levels (n=67) |      |                 |         | Model 7 without uNGAL levels (n=72) |      |                |         | Model 8 with uNGAL levels (n=72) |      |                |         |
|                                           | Coefficient                      | SE   | 95% CI          | P-value | Coefficient                         | SE   | 95% CI         | P-value | Coefficient                      | SE   | 95% CI         | P-value |
| Age                                       | -0.11                            | 0.08 | -0.29 to 0.06   | 0.202   | -0.18                               | 0.10 | -0.38 to 0.01  | 0.068   | -0.18                            | 0.09 | -0.37 to 0.01  | 0.066   |
| Season                                    |                                  |      |                 |         |                                     |      |                |         |                                  |      |                |         |
| Summer                                    | 0                                | --   | --              | --      | 0                                   | --   | --             | --      | 0                                | --   | --             | --      |
| Winter                                    | 1.00                             |      |                 |         | 1.00                                |      |                |         | 1.00                             |      |                |         |
| Outdoor work                              |                                  |      |                 |         |                                     |      |                |         |                                  |      |                |         |
| Yes                                       | 1.48                             | 1.13 | -0.73 to 3.71   | 0.190   | 3.12                                | 2.01 | -0.81 to 7.07  | 0.120   | 3.35                             | 2.14 | -0.84 to 7.55  | 0.117   |
| No                                        | 1.00                             |      |                 |         | 1.00                                |      |                |         | 1.00                             |      |                |         |
| Urinary ACR                               |                                  |      |                 |         |                                     |      |                |         |                                  |      |                |         |
| ≥30 mg/g                                  | 0                                | --   | --              | --      | 0                                   | --   | --             | --      | 0                                | --   | --             | --      |
| <30 mg/g                                  | 1.00                             |      |                 |         | 1.00                                |      |                |         | 1.00                             |      |                |         |
| Urinary NGAL                              | 0.63                             | 0.62 | -0.58 to 1.84   | 0.310   | -                                   | -    | -              | -       | 0.76                             | 0.63 | -0.48 to 2.01  | 0.229   |
| eGFR <sub>Scr</sub> at baseline           | -0.02                            | 0.02 | -0.06 to 0.01   | 0.243   | -0.0001                             | 0.01 | -0.03 to 0.03  | 0.996   | 0.0006                           | 0.01 | -0.03 to 0.03  | 0.972   |
| eGFR <sub>Scr</sub> at second study visit | -0.05                            | 0.02 | -0.10 to -0.004 | 0.034   | -                                   | -    | -              | -       | -                                | -    | -              | -       |
| eGFR <sub>Scr</sub> at third study visit  | -                                | -    | -               | -       | -0.07                               | 0.02 | -0.11 to -0.03 | <0.001  | -0.07                            | 0.02 | -0.11 to -0.03 | <0.001  |

Abbreviations: SE: standard error, uNGAL: urinary neutrophil gelatinase-associated lipocalin, UACR: urinary albumin creatinine ratio, eGFR<sub>Scr</sub>: estimated glomerular filtration rate based on locally measured creatinine levels.

**Continued: Table S4: Multivariate adjusted logistic regression analysis of factors associated with a rapid decline in kidney function at baseline among apparently healthy young males**

| Factors                                   | Figure 2D                           |      |                |         |                                   |      |                |         |
|-------------------------------------------|-------------------------------------|------|----------------|---------|-----------------------------------|------|----------------|---------|
|                                           | Model 9 without uNGAL levels (n=66) |      |                |         | Model 10 with uNGAL levels (n=66) |      |                |         |
|                                           | Coefficient                         | SE   | 95% CI         | P-value | Coefficient                       | SE   | 95% CI         | P-value |
| Age                                       | -0.25                               | 0.12 | -0.50 to 0.002 | 0.053   | -0.23                             | 0.12 | -0.49 to 0.01  | 0.065   |
| Season                                    |                                     |      |                |         |                                   |      |                |         |
| Summer                                    | 0                                   | --   | --             | --      | 0                                 | --   | --             | --      |
| Winter                                    | 1.00                                |      |                |         | 1.00                              |      |                |         |
| Outdoor work                              |                                     |      |                |         |                                   |      |                |         |
| Yes                                       | 3.40                                | 2.24 | -1.00 to 7.81  | 0.130   | 3.47                              | 2.29 | -1.02 to 7.97  | 0.130   |
| No                                        | 1.00                                |      |                |         | 1.00                              |      |                |         |
| Urinary ACR                               |                                     |      |                |         |                                   |      |                |         |
| ≥30 mg/g                                  | 0                                   | --   | --             | --      | 0                                 | --   | --             | --      |
| <30 mg/g                                  | 1.00                                |      |                |         | 1.00                              |      |                |         |
| Urinary NGAL                              | -                                   | -    | -              | -       | 0.42                              | 0.73 | -1.01 to 1.86  | 0.561   |
| eGFR <sub>Scr</sub> at baseline           | -0.02                               | 0.02 | -0.07 to 0.01  | 0.239   | -0.02                             | 0.02 | -0.06 to 0.01  | 0.254   |
| eGFR <sub>Scr</sub> at second study visit | -0.03                               | 0.02 | -0.08 to 0.02  | 0.269   | -0.02                             | 0.02 | -0.08 to 0.03  | 0.360   |
| eGFR <sub>Scr</sub> at third study visit  | -0.08                               | 0.02 | -0.12 to -0.03 | 0.001   | -0.07                             | 0.02 | -0.12 to -0.03 | 0.001   |

Abbreviations: SE: standard error, uNGAL: urinary neutrophil gelatinase-associated lipocalin, UACR: urinary albumin creatinine ratio, eGFR<sub>Scr</sub>: estimated glomerular filtration rate based on locally measured creatinine levels.

Figure S2: ROC curves for the model predicting stable kidney function versus established renal dysfunction. The 95% confidence intervals for the ROC curves (0.5) are displayed.

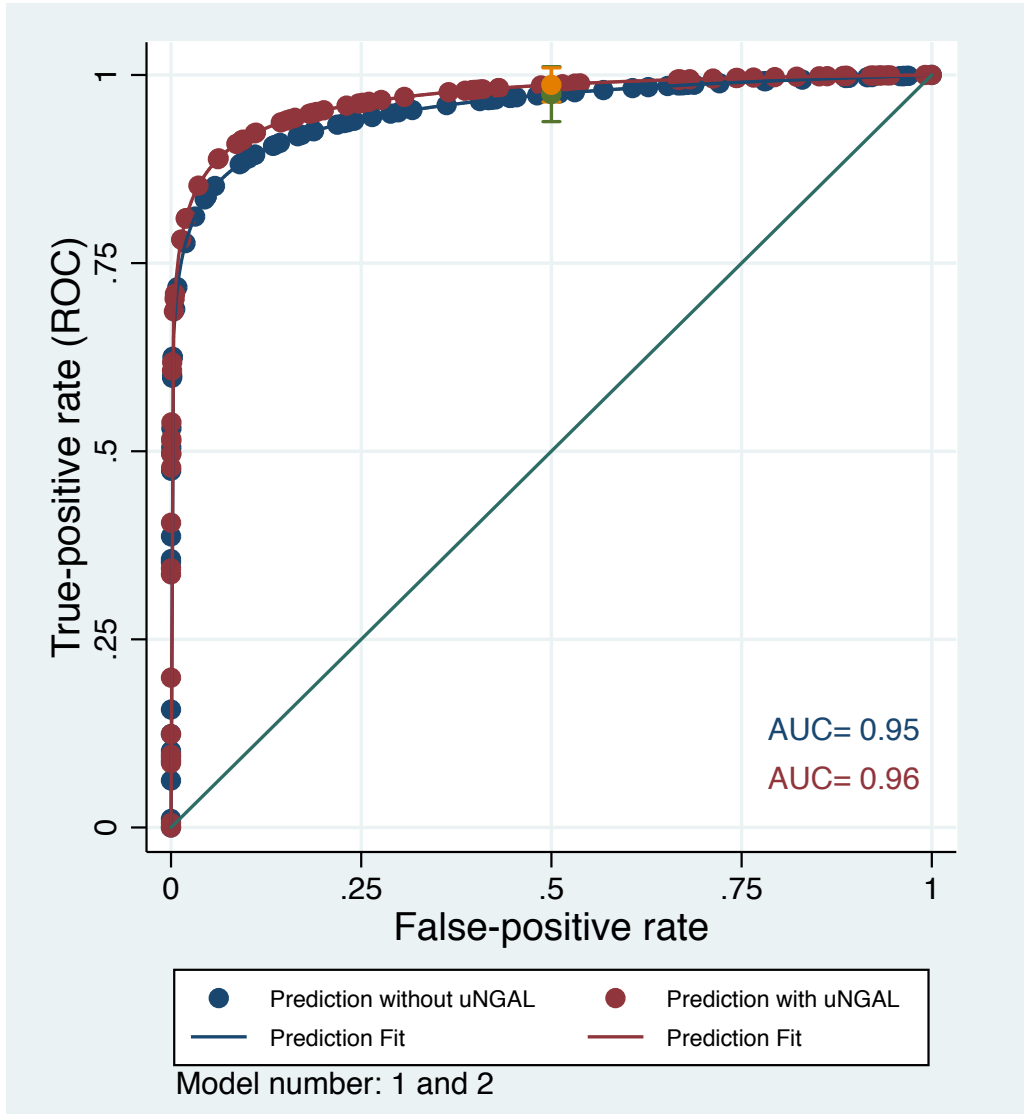

**Figure S3: ROC curves for the model predicting stable kidney function versus a rapid decline in kidney function. The 95% confidence intervals for ROC curves (0.5) are displayed.**

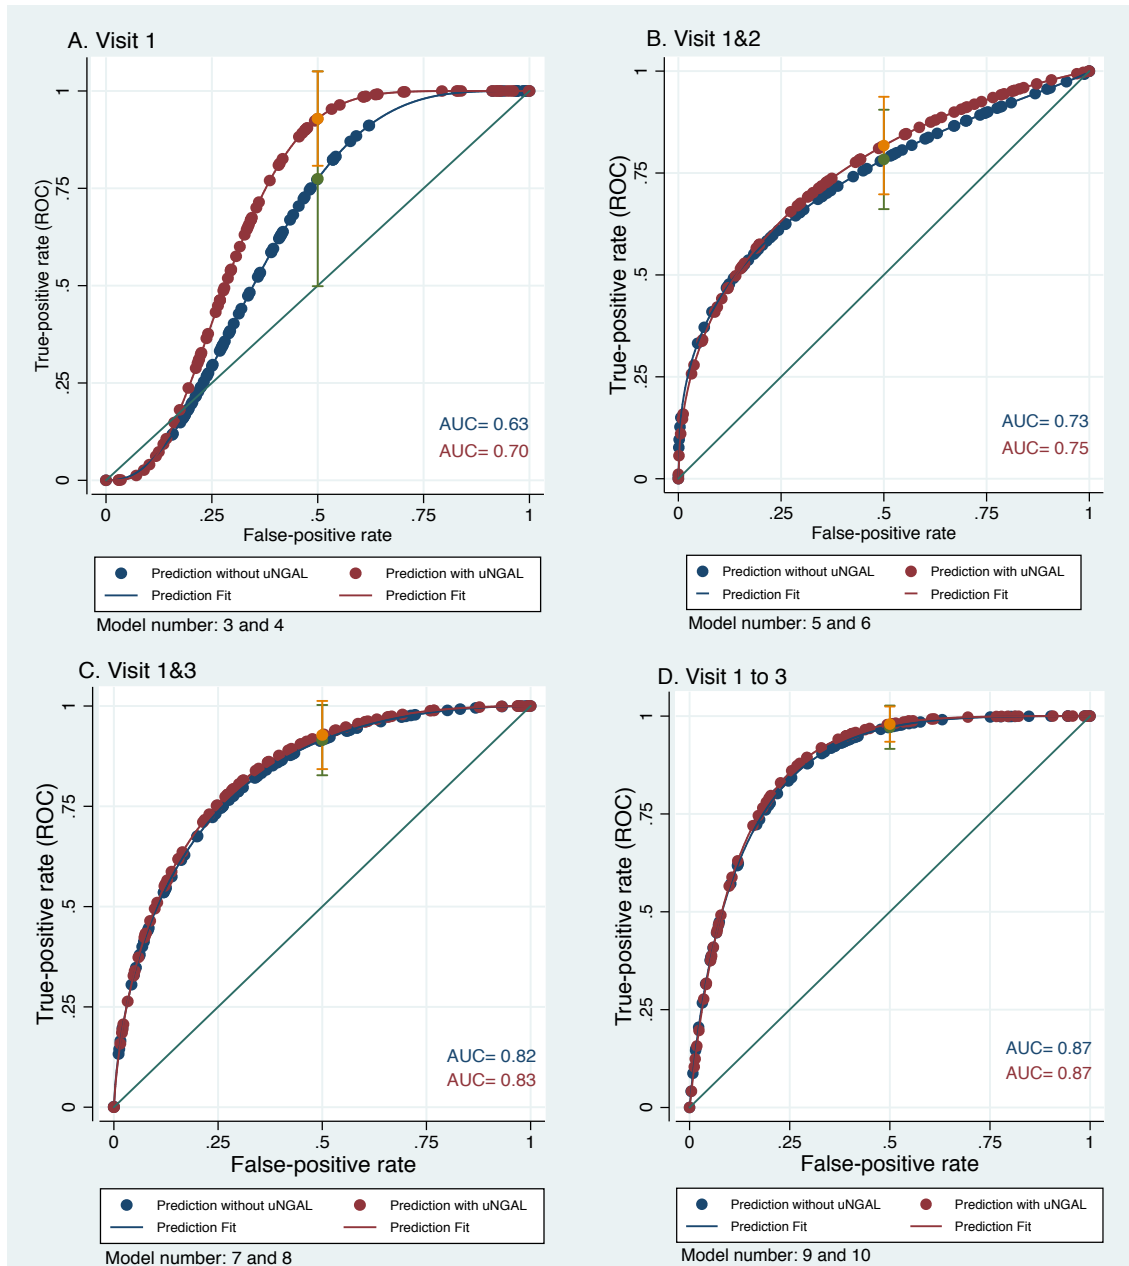

Supplement: MOESM1 [file 16400930]
